# Supplementary material for: MiR-193b regulates breast cancer cell migration and vasculogenic mimicry by targeting dimethylarginine dimethylaminohydrolase 1
Source: PubMed Central journal article supplement (PMC5656623; doi:10.1038/s41598-017-14454-1), 2017-10-25
Supplement: 41598_2017_14454_MOESM1_ESM.pdf [file 41598_2017_14454_MOESM1_ESM.pdf]

**MiR-193b regulates breast cancer cell migration and vasculogenic mimicry by targeting dimethylarginine dimethylaminohydrolase 1**

Julie-Ann Hulin\*<sup>1,2</sup>, Sara Tommasi<sup>1</sup>, David Elliot<sup>1</sup>, Dong Gui Hu<sup>1,2</sup>, Benjamin C. Lewis<sup>1,2</sup>  
and Arduino A. Mangoni<sup>1</sup>

<sup>1</sup>Clinical Pharmacology, Flinders University College of Medicine and Public Health, Flinders Medical Centre, Bedford Park, South Australia, Australia

<sup>2</sup>Flinders Centre for Innovation in Cancer, Bedford Park, South Australia, Australia

\*Corresponding author. Phone: (08) 8204 5096. Email: [julieann.hulin@flinders.edu.au](mailto:julieann.hulin@flinders.edu.au)

## Supplementary material

### UPLC-MS analysis of L-Citrulline

Citrulline, ADMA and arginine analysis was performed on a Waters ACQUITY™ Ultra Performance LC™ system coupled to a Waters Premier quadrupole time of flight (qToF) mass spectrometer with an electrospray ionisation source operated in positive ionisation mode. Time-of-flight (ToF) data were collected in MS mode between 100 and 500 Da with an instrument scan time of 0.5 sec and inter-scan delay of 0.05 sec. Experimental parameters were as follows: capillary voltage 3.5 kV, source temperature 90°C, desolvation temperature 300°C, sampling and extraction cone voltages were 20 and 5 eV, respectively. The collision gas flow was 0.4 mL/min. Instrument control, data acquisition and data processing were performed using Waters MassLynx version 4.1 software.

Chromatographic separation was performed at a flow rate of 0.3 mL/min on a Waters ACQUITY UPLC® BEH HILIC column (1.7 µm, 2.1 mm x 100 mm) held at 35°C. Mobile phase composition was 0.1% v/v formic acid in acetonitrile (mobile phase A) and 10% v/v acetonitrile in water containing 0.1% v/v formic acid (mobile phase B). Initial conditions were 95% mobile phase A and 5% mobile phase B. The proportion of mobile phase B was increased linearly to 40% over 5 min and then returned to 5% for 2 min to re-establish equilibrium before injection of the following sample for analysis.

Extracted ion chromatograms (EICs) were obtained with a mass window of 0.02 Da from total ion chromatograms (TIC) employing the m/z corresponding to the 176.10→159.10 and 181.13→165.12 fragments of L-citrulline and L-citrulline-d6 respectively. For quantitation, L-citrulline was spiked into MDA-MB-231 lysate at 6 concentrations (0, 1, 2, 3, 4 and 5 µM) then extracted and reconstituted in the same manner as incubation samples. A calibration curve was constructed by plotting the peak area ratio L-citrulline to internal standard versus the L-citrulline concentration (Supplementary Figure 3). Extracted ion chromatograms at m/z

203.15 and 175.13 corresponding to the parent ions for ADMA and arginine were used to assess the relative change in the concentrations of these analytes based on peak area.

**Supplementary Table 1.** Primers used for qRT-PCR, cloning and mutagenesis. Underline indicates restriction site. / indicates deleted binding site. V = G, C or A but not T. N = G, C, A or T.

| <b>Primer</b>                                | <b>Sequence (5'-3')</b>                             |
|----------------------------------------------|-----------------------------------------------------|
| <b>qRT-PCR</b>                               |                                                     |
| 18S F                                        | CGATGCTCTTAGCTGAGTGT                                |
| 18S R                                        | GGTCCAAGAATTTACCTCT                                 |
| DDAH1-V1 F                                   | CTCCGGACTGCGTCTTC                                   |
| DDAH1-V1 R                                   | TGCTTCTTTCATCATGTCAACC                              |
| DDAH-V2 F                                    | CTCAAGTCCTGCCAAAGAC                                 |
| DDAH-V2 R                                    | CCTTTTCCATACAGATGAAACCA                             |
| DDAH1-V3 F                                   | GCAAATGTTTATGGGTTGACAT                              |
| DDAH-V3 R                                    | GCACCTCGTTGATTTGCTCT                                |
| VEGF-A F                                     | TGCTGTCTTGGGTGCATT                                  |
| VEGF-A R                                     | GTGCTGTAGGAAGCTCATCTC                               |
| Universal R oligo for miR-cDNA generation    | CAGGTCCAGTTTTTTTTTTTTTTVN                           |
| miR-193b F                                   | AACTGGCCCTCAAAGTCC                                  |
| miR-193b R                                   | GGTCCAGTTTTTTTTTTTTTTAGCG                           |
| RNU6-2 F                                     | CGCAAGGATGACACGCA                                   |
| RNU6-2 R                                     | AAAAATATGGAACGCTTCAC                                |
| <b>Cloning and site-directed mutagenesis</b> |                                                     |
| DDAH1 3'UTR F                                | ACTCTAGACGGTAGCCGGCAAGACC                           |
| DDAH1 3'UTR R                                | GCGTCTAGACACAGTACAACACTCAACAC                       |
| DDAH1 3'UTR 193bmut Top                      | GGTGTGAAAATTATTTAGTT/TATTCTGAAGAATGTCTTCTTGATCAGTC  |
| DDAH1 3'UTR 193bmut Bottom                   | GA CTGATCAAGAAGACATTCTTCAGAATA/AACTAAATAATTTTCACACC |

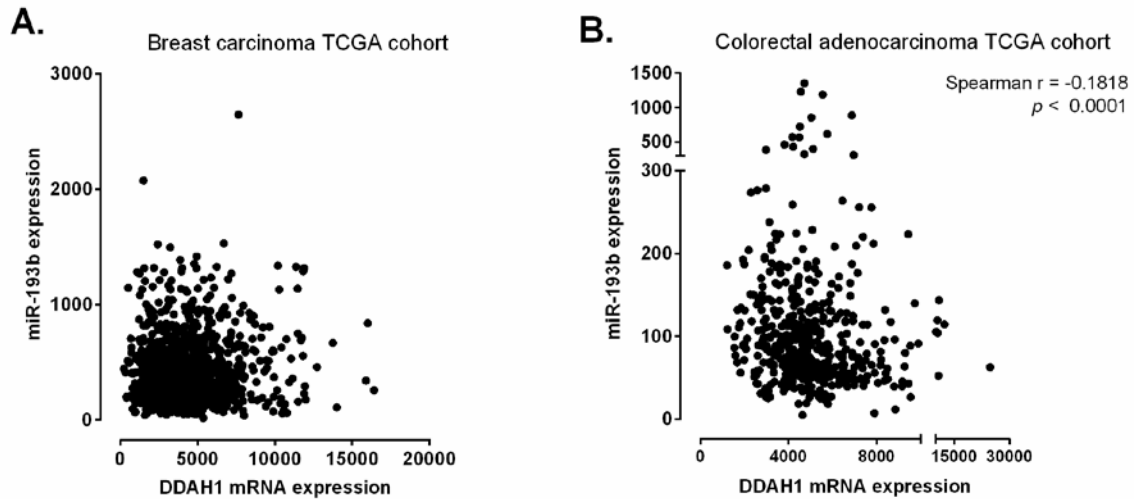

**Supplementary Figure 1.** Analysis of DDAH1 and miR-193b expression in breast carcinoma and colorectal carcinoma specimens from The Cancer Genome Atlas (TCGA) database. **(A):** Spearman's rank-order correlation analysis shows no correlation between DDAH1 and miR-193b in the breast carcinoma cohort when all 1188 samples including 104 normal breast specimens and 1084 breast carcinoma specimens were analysed together. **(B):** A significant inverse correlation between DDAH1 and miR-193b expression is observed in the colorectal adenocarcinoma cohort that contained 461 cancer specimens.

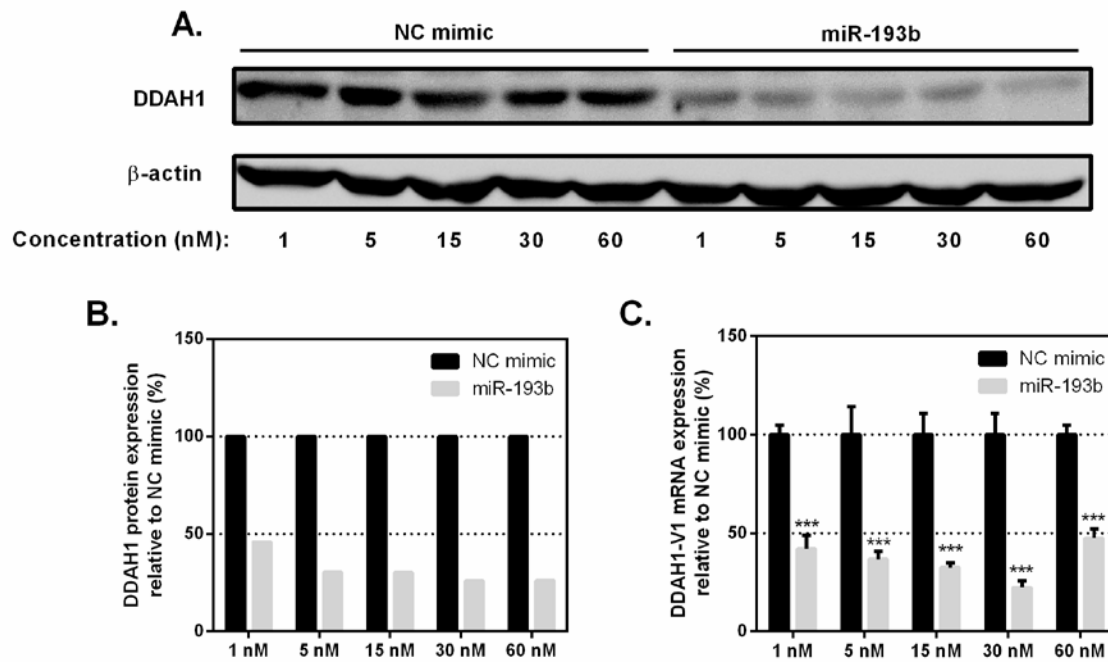

**Supplementary Figure 2.** Dose-dependent effect of miR-193b on DDAH1 expression in MDA-MB-231 cells. **(A):** Expression of endogenous DDAH1-V1 (full length protein) following transfection of increasing concentrations of miR-193b mimic or control (NC), with  $\beta$ -actin as a loading control. **(B):** Quantification of DDAH1 protein expression in (A), normalised to  $\beta$ -actin expression and shown relative to DDAH1 expression in control transfected cells, set to 100%. **(C):** Expression of DDAH1-V1 mRNA as assessed by qRT-PCR. Data are normalised to the housekeeping gene 18S and presented relative to DDAH1 expression in control transfected cells, set to 100%. Error bars represent SEM.

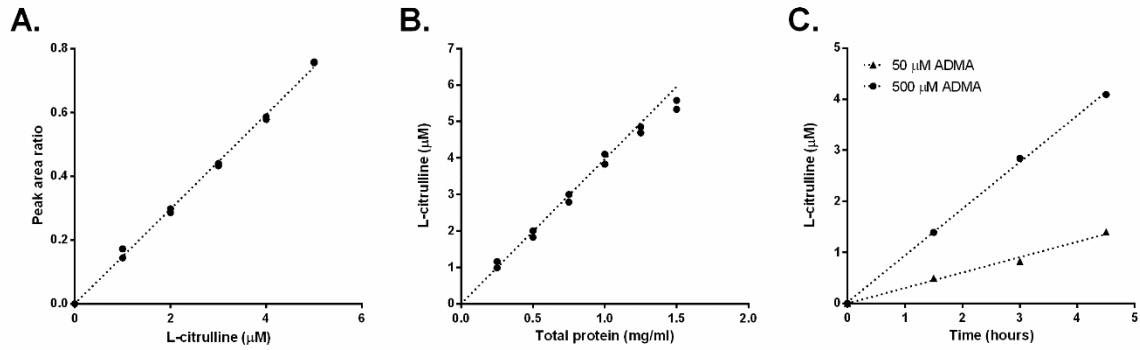

**Supplementary Figure 3.** Optimisation of DDAH1 activity assay. **(A):** Representative L-citrulline calibration curve. L-citrulline concentrations for matrix-matched calibrators were between 0 and 5 μM and samples were run in duplicate. **(B):** Protein linearity data were collected in duplicate at 200 μM ADMA with a 3 hr incubation period. **(C):** Time linearity was assessed with 50 and 500 μM ADMA with 1 mg/ml total protein.

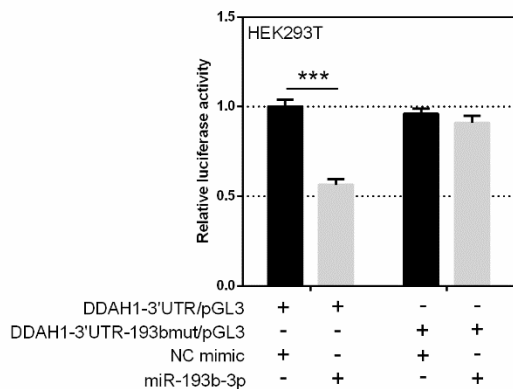

**Supplementary Figure 4.** The 3'UTR of *DDAH1* is a direct target of miR-193b in HEK293T cells. Constructs carrying the WT *DDAH1* 3'UTR or a *DDAH1* 3'UTR with a deleted miR-193b seed site downstream of a firefly luciferase gene were generated. Co-transfection of 30 nM miR-193b mimic reduces *DDAH1* 3'UTR reporter activity, but not upon deletion of the miR-193b seed site. Luciferase activities were measured 24 hr post transfection and are expressed as the mean *firefly/Renilla* luciferase ratio relative to that of empty pGL3-promoter vector and normalised to NC mimic transfection, set to a value of 1.

Data are the average of at least two independent experiments performed in quadruplicate. Error bars represent SEM. \*\*\*  $p < 0.001$ .

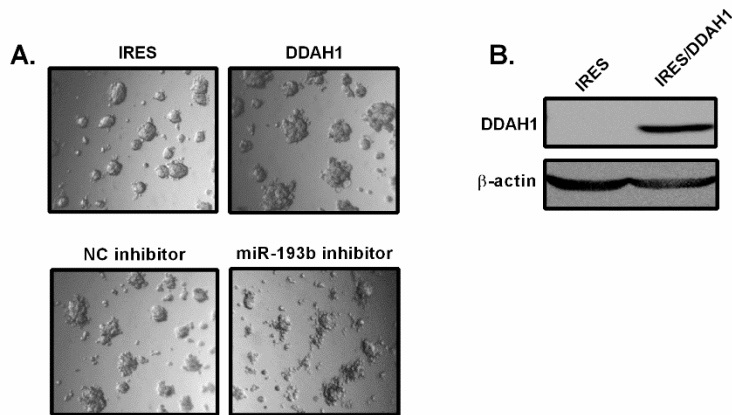

**Supplementary Figure 5.** DDAH1 over-expression or miR-193b inhibition does not promote tube formation in MCF7 Matrigel-based assays. **(A):** MCF7 cells stably expressing either empty IRES plasmid or IRES/DDAH1 plasmid, or MCF7 cells transiently transfected with either 100 nM NC or miR-193b inhibitor, were imaged 24 hr post seeding on Matrigel. Two independent experiments were performed in triplicate. Representative phase-contrast images are shown. **(B):** Validation of DDAH1 expression in the MCF7 DDAH1-stably expressing cell line. DDAH1 protein expression was assessed by western blotting using  $\beta$ -actin expression as a control for total protein.

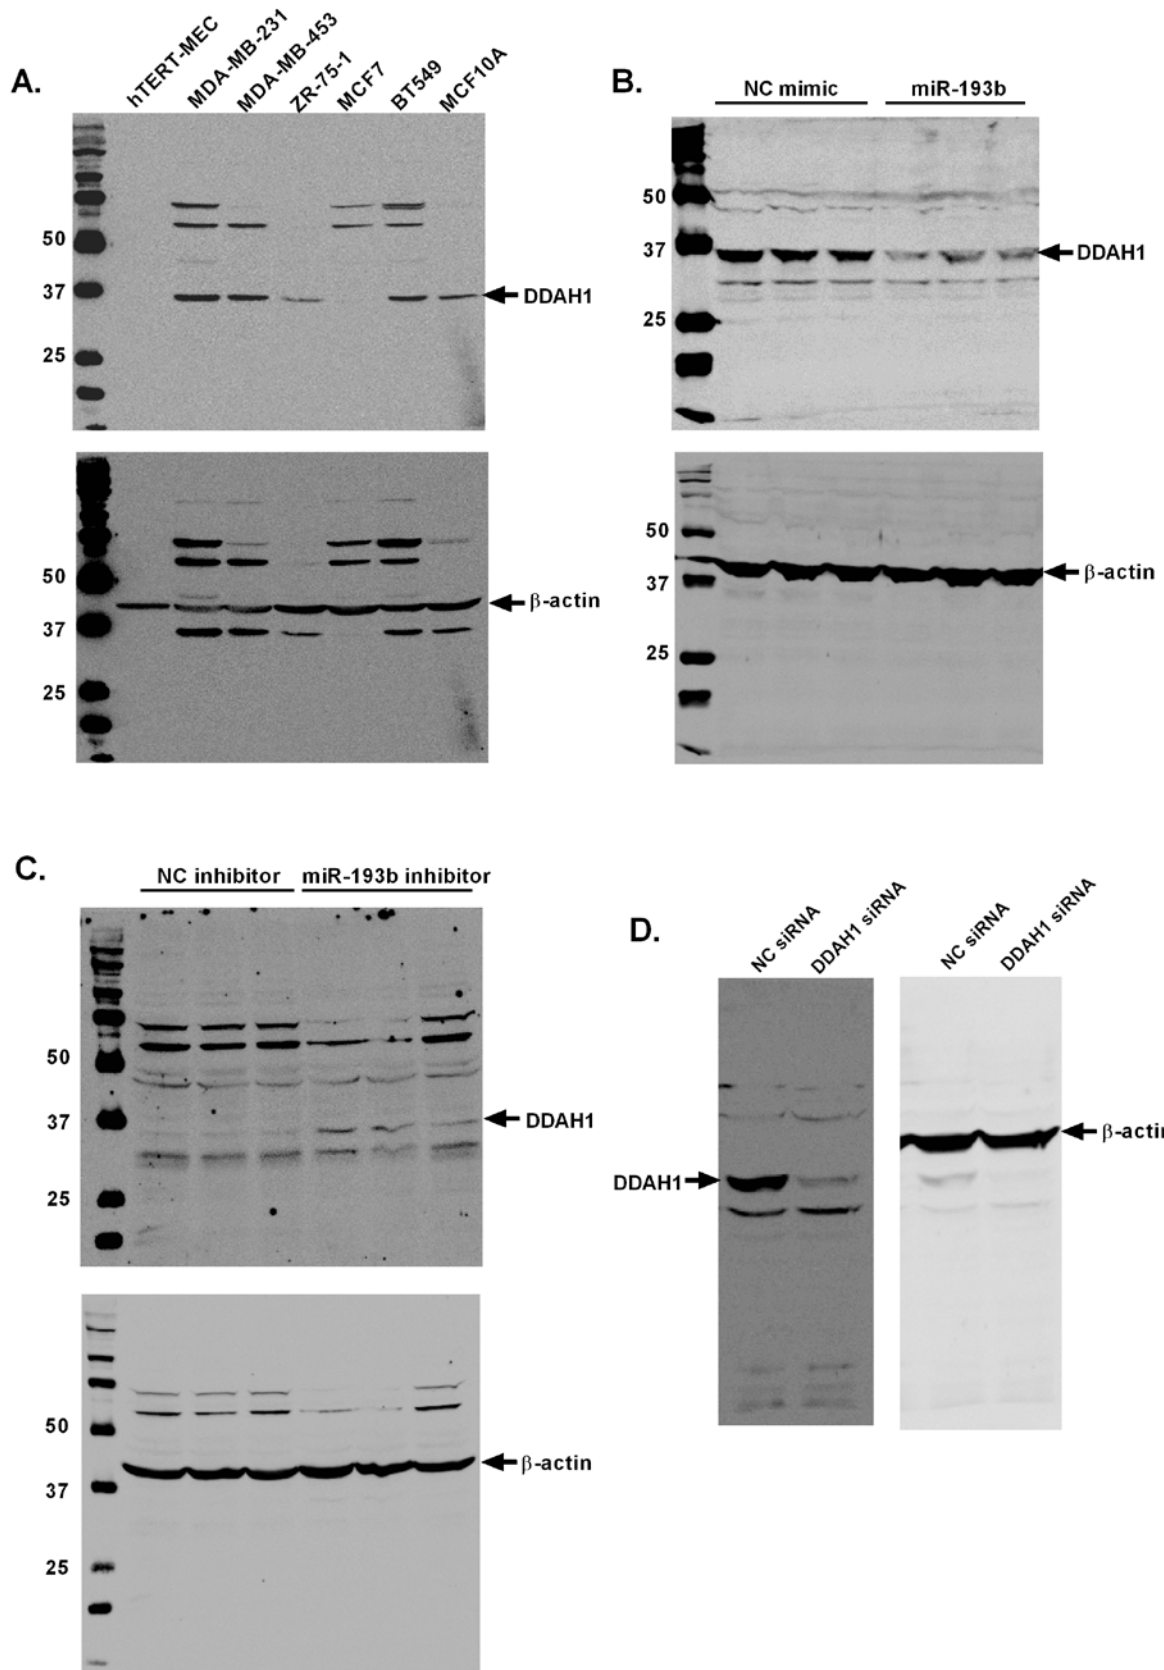

**Supplementary Figure 6.** Full length images of blots that appear in figures within the main text. (A): Blots corresponding to Figure 2E. (B): Blots corresponding to Figure 3B. (C):



Blots corresponding to Figure 4B. **(D)**: Blots corresponding to Figure 6B. DDAH1 (~37 kDa) and  $\beta$ -actin (~42 kDa) bands are marked. For further experimental details refer to the appropriate legends of the main figures.
